# Supplementary material for: Estimated projection of oral cavity and oropharyngeal cancer deaths in Spain to 2044
Source: Springer Nature journal article supplement (doi:10.1186/s12903-022-02487-6), 2022-10-14
Supplement: MOESM1 [file 23604910]

**Additional File Material for:**

**Estimated projection of oral cavity and oropharyngeal cancer deaths in Spain to 2044**

**Pedro Infante-Cossio <sup>1</sup>, Antonio-Jose Duran-Romero <sup>2</sup>, Antonio Castaño-Seiquer <sup>3</sup>, Rafael Martínez-De-Fuentes <sup>4</sup> and Jose-Juan Pereyra-Rodriguez <sup>2</sup>**

<sup>1</sup> Department of Oral and Maxillofacial Surgery, Virgen del Rocio University Hospital, University of Seville, Seville, Spain

<sup>2</sup> Department of Dermatology, Virgen del Rocio University Hospital, University of Seville, Seville, Spain

<sup>3</sup> Department of Preventive and Community Dentistry, School of Dentistry, University of Seville, Seville, Spain

<sup>4</sup> Department of Prosthodontics, School of Dentistry, University of Seville, Seville, Spain

**Content:**

**Table 1.** Number of observed (period 1980-2019) and projected (period 2020-2044) deaths by 5-year blocks for OCC: A) both sexes; B) males; C) females.

**Table 2.** Number of observed (period 1980-2019) and projected (period 2020-2044) deaths by 5-year blocks for OPC: A) both sexes; B) males; C) females.

**Table 3.** Observed (period 1980-2019) and projected (period 2020-2044) age-specific mortality rates per 100,000 inhabitants (European population 2013) by 5-year blocks for OCC: A) both sexes; B) males; C) females. SMR: standardized mortality rates

**Table 4.** Observed (period 1980-2019) and projected (period 2020-2044) age-specific mortality rates per 100,000 inhabitants (European population 2013) by 5-year blocks for OPC: A) both sexes; B) males; C) females. SMR: standardized mortality rates

**Table 1.** Number of observed (period 1980-2019) and projected (period 2020-2044) deaths by 5-year blocks for OCC: A) both sexes; B) males; C) females.

| <b>NUMBER OF DEATHS BY ORAL CAVITY CANCER</b> |                        |           |           |           |           |           |           |           |                         |           |           |           |           |
|-----------------------------------------------|------------------------|-----------|-----------|-----------|-----------|-----------|-----------|-----------|-------------------------|-----------|-----------|-----------|-----------|
| Age (years)                                   | <b>Observed deaths</b> |           |           |           |           |           |           |           | <b>Projected deaths</b> |           |           |           |           |
|                                               | 1980-1984              | 1985-1989 | 1990-1994 | 1995-1999 | 2000-2004 | 2005-2009 | 2010-2014 | 2015-2019 | 2020-2024               | 2025-2029 | 2030-2034 | 2035-2039 | 2040-2044 |
| <b>A) Both sexes</b>                          |                        |           |           |           |           |           |           |           |                         |           |           |           |           |
| <34                                           | 70                     | 40        | 23        | 32        | 30        | 27        | 31        | 40        | 56                      | 57        | 63        | 69        | 71        |
| 35-44                                         | 178                    | 213       | 226       | 218       | 215       | 134       | 86        | 81        | 111                     | 135       | 183       | 184       | 197       |
| 45-54                                         | 673                    | 643       | 720       | 703       | 661       | 641       | 553       | 438       | 341                     | 373       | 406       | 473       | 581       |
| 55-64                                         | 850                    | 1184      | 1218      | 1061      | 970       | 1010      | 1085      | 1136      | 1035                    | 826       | 687       | 742       | 778       |
| 65-74                                         | 766                    | 885       | 1142      | 1200      | 1191      | 1054      | 1131      | 1209      | 1362                    | 1436      | 1381      | 1124      | 958       |
| >75                                           | 787                    | 903       | 1079      | 1103      | 1309      | 1523      | 1977      | 2259      | 2503                    | 2796      | 3181      | 3638      | 3860      |
| All ages                                      | 3324                   | 3868      | 4408      | 4317      | 4376      | 4389      | 4863      | 5163      | 5408                    | 5623      | 5901      | 6229      | 6445      |
| <b>B) Males</b>                               |                        |           |           |           |           |           |           |           |                         |           |           |           |           |
| <34                                           | 51                     | 31        | 15        | 20        | 19        | 14        | 18        | 24        | 31                      | 30        | 31        | 33        | 33        |
| 35-44                                         | 158                    | 193       | 204       | 184       | 174       | 106       | 60        | 57        | 79                      | 96        | 129       | 127       | 135       |
| 45-54                                         | 609                    | 598       | 651       | 635       | 582       | 544       | 445       | 329       | 252                     | 273       | 306       | 364       | 444       |
| 55-64                                         | 745                    | 1078      | 1097      | 955       | 848       | 843       | 872       | 889       | 740                     | 564       | 461       | 508       | 555       |
| 65-74                                         | 650                    | 740       | 946       | 984       | 948       | 846       | 856       | 881       | 916                     | 908       | 805       | 627       | 530       |
| >75                                           | 546                    | 633       | 697       | 628       | 762       | 815       | 1027      | 1062      | 1151                    | 1226      | 1313      | 1383      | 1368      |
| All ages                                      | 2759                   | 3273      | 3610      | 3406      | 3333      | 3168      | 3278      | 3242      | 3168                    | 3096      | 3045      | 3043      | 3064      |
| <b>C) Females</b>                             |                        |           |           |           |           |           |           |           |                         |           |           |           |           |
| <34                                           | 19                     | 9         | 8         | 12        | 11        | 13        | 13        | 16        | 25                      | 28        | 32        | 36        | 38        |
| 35-44                                         | 20                     | 20        | 22        | 34        | 41        | 28        | 26        | 24        | 33                      | 39        | 54        | 57        | 63        |
| 45-54                                         | 64                     | 45        | 69        | 68        | 79        | 97        | 108       | 109       | 90                      | 100       | 100       | 109       | 137       |
| 55-64                                         | 105                    | 106       | 121       | 106       | 122       | 167       | 213       | 247       | 295                     | 262       | 226       | 234       | 223       |
| 65-74                                         | 116                    | 145       | 196       | 216       | 243       | 208       | 275       | 328       | 446                     | 529       | 576       | 497       | 428       |
| >75                                           | 241                    | 270       | 382       | 475       | 547       | 708       | 950       | 1197      | 1352                    | 1570      | 1867      | 2254      | 2493      |
| All ages                                      | 565                    | 595       | 798       | 911       | 1043      | 1221      | 1585      | 1921      | 2240                    | 2528      | 2856      | 3186      | 3381      |

**Table 2.** Number of observed (period 1980-2019) and projected (period 2020-2044) deaths by 5-year blocks for OPC: A) both sexes; B) males; C) females.

| <b>NUMBER OF DEATHS BY OROPHARYNGEAL CANCER</b> |                        |           |           |           |           |           |           |           |                         |           |           |           |           |
|-------------------------------------------------|------------------------|-----------|-----------|-----------|-----------|-----------|-----------|-----------|-------------------------|-----------|-----------|-----------|-----------|
| Age (years)                                     | <b>Observed deaths</b> |           |           |           |           |           |           |           | <b>Projected deaths</b> |           |           |           |           |
|                                                 | 1980-1984              | 1985-1989 | 1990-1994 | 1995-1999 | 2000-2004 | 2005-2009 | 2010-2014 | 2015-2019 | 2020-2024               | 2025-2029 | 2030-2034 | 2035-2039 | 2040-2044 |
| <b>A) Both sexes</b>                            |                        |           |           |           |           |           |           |           |                         |           |           |           |           |
| <34                                             | 11                     | 14        | 10        | 10        | 5         | 2         | 6         | 5         | 6                       | 5         | 6         | 6         | 6         |
| 35-44                                           | 70                     | 126       | 168       | 208       | 153       | 84        | 60        | 29        | 45                      | 64        | 59        | 59        | 62        |
| 45-54                                           | 244                    | 396       | 536       | 599       | 649       | 549       | 480       | 350       | 232                     | 195       | 237       | 287       | 269       |
| 55-64                                           | 303                    | 548       | 802       | 807       | 816       | 807       | 895       | 926       | 772                     | 586       | 431       | 386       | 461       |
| 65-74                                           | 200                    | 331       | 488       | 607       | 741       | 634       | 705       | 864       | 959                     | 947       | 833       | 649       | 486       |
| >75                                             | 107                    | 176       | 288       | 317       | 380       | 439       | 617       | 654       | 780                     | 943       | 1134      | 1281      | 1312      |
| All ages                                        | 935                    | 1591      | 2292      | 2548      | 2744      | 2515      | 2763      | 2828      | 2794                    | 2742      | 2700      | 2668      | 2596      |
| <b>B) Males</b>                                 |                        |           |           |           |           |           |           |           |                         |           |           |           |           |
| <34                                             | 7                      | 9         | 9         | 10        | 3         | 1         | 2         | 5         | 5                       | 5         | 5         | 5         | 5         |
| 35-44                                           | 65                     | 121       | 159       | 187       | 130       | 64        | 47        | 24        | 38                      | 64        | 59        | 59        | 62        |
| 45-54                                           | 233                    | 389       | 519       | 558       | 590       | 484       | 404       | 300       | 210                     | 171       | 217       | 286       | 269       |
| 55-64                                           | 289                    | 526       | 769       | 773       | 768       | 726       | 785       | 787       | 653                     | 507       | 384       | 327       | 420       |
| 65-74                                           | 183                    | 299       | 454       | 575       | 678       | 574       | 617       | 748       | 808                     | 775       | 658       | 516       | 397       |
| >75                                             | 76                     | 115       | 228       | 257       | 296       | 335       | 488       | 504       | 607                     | 716       | 808       | 844       | 789       |
| All ages                                        | 853                    | 1459      | 2138      | 2360      | 2465      | 2184      | 2343      | 2368      | 2321                    | 2237      | 2130      | 2036      | 1943      |
| <b>C) Females</b>                               |                        |           |           |           |           |           |           |           |                         |           |           |           |           |
| <34                                             | 4                      | 5         | 1         | 0         | 2         | 1         | 4         | 0         | 1                       | 1         | 1         | 1         | 1         |
| 35-44                                           | 5                      | 5         | 9         | 21        | 23        | 20        | 13        | 5         | 7                       | 0         | 0         | 0         | 0         |
| 45-54                                           | 11                     | 7         | 17        | 41        | 59        | 65        | 76        | 50        | 22                      | 25        | 20        | 1         | 1         |
| 55-64                                           | 14                     | 22        | 33        | 34        | 48        | 81        | 110       | 139       | 119                     | 79        | 47        | 59        | 41        |
| 65-74                                           | 17                     | 32        | 34        | 32        | 63        | 60        | 88        | 116       | 151                     | 172       | 175       | 133       | 89        |
| >75                                             | 31                     | 61        | 60        | 60        | 84        | 104       | 129       | 150       | 173                     | 228       | 326       | 438       | 523       |
| All ages                                        | 82                     | 132       | 154       | 188       | 279       | 331       | 420       | 460       | 473                     | 504       | 570       | 632       | 654       |

**Table 3.** Observed (period 1980-2019) and projected (period 2020-2044) age-specific mortality rates per 100,000 inhabitants (European population 2013) by 5-year blocks for OCC: A) both sexes; B) males; C) females. SMR: standardized mortality rates

| <b>AGE-SPECIFIC MORTALITY RATES FOR ORAL CAVITY CANCER</b> |                                             |           |           |           |           |           |           |           |                                              |           |           |           |           |
|------------------------------------------------------------|---------------------------------------------|-----------|-----------|-----------|-----------|-----------|-----------|-----------|----------------------------------------------|-----------|-----------|-----------|-----------|
| Age (years)                                                | <b>Observed standardized mortality rate</b> |           |           |           |           |           |           |           | <b>Projected standardized mortality rate</b> |           |           |           |           |
|                                                            | 1980-1984                                   | 1985-1989 | 1990-1994 | 1995-1999 | 2000-2004 | 2005-2009 | 2010-2014 | 2015-2019 | 2020-2024                                    | 2025-2029 | 2030-2034 | 2035-2039 | 2040-2044 |
| <b>A) Both sexes</b>                                       |                                             |           |           |           |           |           |           |           |                                              |           |           |           |           |
| <34                                                        | 0.11                                        | 0.12      | 0.06      | 0.07      | 0.05      | 0.05      | 0.07      | 0.12      | 0.18                                         | 0.19      | 0.20      | 0.21      | 0.21      |
| 35-44                                                      | 1.00                                        | 1.07      | 1.15      | 0.97      | 0.86      | 0.48      | 0.26      | 0.24      | 0.37                                         | 0.48      | 0.78      | 0.78      | 0.79      |
| 45-54                                                      | 3.03                                        | 3.19      | 3.51      | 3.04      | 2.68      | 2.34      | 1.83      | 1.47      | 0.98                                         | 1.04      | 1.28      | 1.64      | 2.22      |
| 55-64                                                      | 4.58                                        | 5.65      | 5.67      | 5.28      | 4.66      | 4.25      | 4.18      | 4.00      | 3.31                                         | 2.50      | 1.85      | 1.97      | 2.30      |
| 65-74                                                      | 5.73                                        | 6.18      | 6.92      | 6.45      | 6.10      | 5.57      | 5.77      | 5.47      | 5.57                                         | 5.18      | 4.31      | 3.22      | 2.44      |
| >75                                                        | 9.88                                        | 9.55      | 10.05     | 8.72      | 8.77      | 8.70      | 9.92      | 10.96     | 11.22                                        | 11.01     | 10.71     | 10.51     | 9.94      |
| SMR                                                        | 2.63                                        | 2.78      | 2.93      | 2.64      | 2.47      | 2.23      | 2.23      | 2.17      | 2.07                                         | 1.95      | 1.82      | 1.73      | 1.68      |
| <b>B) Males</b>                                            |                                             |           |           |           |           |           |           |           |                                              |           |           |           |           |
| <34                                                        | 0.17                                        | 0.18      | 0.07      | 0.08      | 0.07      | 0.07      | 0.10      | 0.13      | 0.21                                         | 0.20      | 0.19      | 0.20      | 0.20      |
| 35-44                                                      | 1.85                                        | 1.97      | 2.11      | 1.68      | 1.39      | 0.76      | 0.36      | 0.33      | 0.51                                         | 0.67      | 1.08      | 1.06      | 1.04      |
| 45-54                                                      | 5.57                                        | 6.08      | 6.41      | 5.58      | 4.75      | 4.03      | 2.97      | 2.21      | 1.41                                         | 1.44      | 1.84      | 2.46      | 3.30      |
| 55-64                                                      | 8.50                                        | 10.72     | 10.65     | 9.85      | 8.41      | 7.29      | 6.90      | 6.46      | 4.88                                         | 3.51      | 2.53      | 2.76      | 3.36      |
| 65-74                                                      | 11.35                                       | 11.92     | 12.84     | 11.64     | 10.62     | 9.67      | 9.30      | 8.53      | 8.10                                         | 7.24      | 5.73      | 4.17      | 3.15      |
| >75                                                        | 18.29                                       | 17.85     | 17.72     | 13.29     | 13.39     | 11.82     | 12.85     | 12.48     | 12.48                                        | 11.94     | 11.30     | 10.62     | 9.80      |
| SMR                                                        | 4.97                                        | 5.29      | 5.38      | 4.61      | 4.2       | 3.6       | 3.4       | 3.09      | 2.78                                         | 2.5       | 2.27      | 2.15      | 2.1       |
| <b>C) Females</b>                                          |                                             |           |           |           |           |           |           |           |                                              |           |           |           |           |
| <34                                                        | 0.07                                        | 0.06      | 0.05      | 0.06      | 0.05      | 0.05      | 0.07      | 0.12      | 0.17                                         | 0.19      | 0.22      | 0.23      | 0.24      |
| 35-44                                                      | 0.19                                        | 0.18      | 0.21      | 0.27      | 0.33      | 0.19      | 0.16      | 0.14      | 0.21                                         | 0.27      | 0.42      | 0.44      | 0.45      |
| 45-54                                                      | 0.59                                        | 0.42      | 0.71      | 0.57      | 0.64      | 0.68      | 0.70      | 0.74      | 0.50                                         | 0.54      | 0.60      | 0.71      | 0.97      |
| 55-64                                                      | 1.11                                        | 1.01      | 1.09      | 1.10      | 1.16      | 1.37      | 1.60      | 1.66      | 1.85                                         | 1.60      | 1.22      | 1.24      | 1.30      |
| 65-74                                                      | 1.52                                        | 1.88      | 2.27      | 2.22      | 2.35      | 2.10      | 2.69      | 2.78      | 3.59                                         | 3.81      | 3.80      | 3.19      | 2.43      |
| >75                                                        | 5.59                                        | 5.35      | 6.06      | 6.49      | 6.41      | 7.14      | 8.40      | 10.35     | 10.91                                        | 11.10     | 11.90     | 13.18     | 13.29     |
| SMR                                                        | 0.86                                        | 0.82      | 0.98      | 0.99      | 1.03      | 1.06      | 1.24      | 1.36      | 1.48                                         | 1.56      | 1.6       | 1.61      | 1.56      |

**Table 4.** Observed (period 1980-2019) and projected (period 2020-2044) age-specific mortality rates per 100,000 inhabitants (European population 2013) by 5-year blocks for OPC: A) both sexes; B) males; C) females. SMR: standardized mortality rates

| <b>AGE-SPECIFIC MORTALITY RATES FOR OROPHARYNGEAL CANCER</b> |                                      |           |           |           |           |           |           |           |                                       |           |           |           |           |
|--------------------------------------------------------------|--------------------------------------|-----------|-----------|-----------|-----------|-----------|-----------|-----------|---------------------------------------|-----------|-----------|-----------|-----------|
| Age (years)                                                  | Observed standardized mortality rate |           |           |           |           |           |           |           | Projected standardized mortality rate |           |           |           |           |
|                                                              | 1980-1984                            | 1985-1989 | 1990-1994 | 1995-1999 | 2000-2004 | 2005-2009 | 2010-2014 | 2015-2019 | 2020-2024                             | 2025-2029 | 2030-2034 | 2035-2039 | 2040-2044 |
| <b>A) Both sexes</b>                                         |                                      |           |           |           |           |           |           |           |                                       |           |           |           |           |
| <34                                                          | 0.02                                 | 0.03      | 0.04      | 0.06      | 0.02      | 0.01      | 0.02      | 0.03      | 0.02                                  | 0.02      | 0.02      | 0.02      | 0.02      |
| 35-44                                                        | 0.43                                 | 0.59      | 0.84      | 1.06      | 0.68      | 0.36      | 0.20      | 0.10      | 0.15                                  | 0.28      | 0.28      | 0.28      | 0.27      |
| 45-54                                                        | 1.11                                 | 1.93      | 2.62      | 2.56      | 2.62      | 2.11      | 1.64      | 1.19      | 0.72                                  | 0.57      | 0.71      | 1.00      | 1.00      |
| 55-64                                                        | 1.62                                 | 2.60      | 3.73      | 3.98      | 3.90      | 3.36      | 3.42      | 3.26      | 2.45                                  | 1.76      | 1.18      | 1.03      | 1.40      |
| 65-74                                                        | 1.50                                 | 2.31      | 2.97      | 3.29      | 3.80      | 3.35      | 3.56      | 3.91      | 3.92                                  | 3.43      | 2.61      | 1.87      | 1.28      |
| >75                                                          | 1.29                                 | 1.79      | 2.57      | 2.45      | 2.51      | 2.40      | 2.97      | 3.03      | 3.28                                  | 3.50      | 3.58      | 3.37      | 2.95      |
| SMR                                                          | 0.67                                 | 1.07      | 1.46      | 1.53      | 1.53      | 1.28      | 1.29      | 1.23      | 1.11                                  | 0.99      | 0.87      | 0.78      | 0.71      |
| <b>B) Males</b>                                              |                                      |           |           |           |           |           |           |           |                                       |           |           |           |           |
| <34                                                          | 0.03                                 | 0.05      | 0.10      | 0.12      | 0.02      | 0.01      | 0.02      | 0.04      | 0.04                                  | 0.04      | 0.04      | 0.04      | 0.04      |
| 35-44                                                        | 0.82                                 | 1.14      | 1.63      | 1.94      | 1.18      | 0.51      | 0.32      | 0.16      | 0.23                                  | 0.55      | 0.55      | 0.54      | 0.54      |
| 45-54                                                        | 2.15                                 | 3.84      | 5.20      | 4.80      | 4.84      | 3.77      | 2.76      | 1.95      | 1.29                                  | 0.96      | 1.30      | 2.04      | 2.03      |
| 55-64                                                        | 3.28                                 | 5.20      | 7.43      | 7.93      | 7.59      | 6.21      | 6.16      | 5.70      | 4.23                                  | 3.06      | 2.16      | 1.78      | 2.76      |
| 65-74                                                        | 3.23                                 | 4.83      | 6.16      | 6.85      | 7.63      | 6.58      | 6.64      | 7.19      | 7.14                                  | 6.15      | 4.59      | 3.32      | 2.38      |
| >75                                                          | 2.56                                 | 3.21      | 5.68      | 5.47      | 5.28      | 4.82      | 5.99      | 5.95      | 6.33                                  | 6.66      | 6.68      | 6.11      | 5.15      |
| SMR                                                          | 1.33                                 | 2.11      | 2.94      | 3.05      | 2.96      | 2.4       | 2.36      | 2.23      | 2.02                                  | 1.79      | 1.58      | 1.44      | 1.35      |
| <b>C) Females</b>                                            |                                      |           |           |           |           |           |           |           |                                       |           |           |           |           |
| <34                                                          | 0.01                                 | 0.02      | 0.01      | 0.00      | 0.01      | 0.01      | 0.03      | 0.00      | 0.01                                  | 0.01      | 0.01      | 0.01      | 0.01      |
| 35-44                                                        | 0.05                                 | 0.04      | 0.07      | 0.19      | 0.18      | 0.20      | 0.08      | 0.03      | 0.08                                  | 0.00      | 0.00      | 0.00      | 0.00      |
| 45-54                                                        | 0.12                                 | 0.08      | 0.19      | 0.36      | 0.46      | 0.47      | 0.53      | 0.48      | 0.13                                  | 0.14      | 0.21      | 0.01      | 0.01      |
| 55-64                                                        | 0.14                                 | 0.20      | 0.30      | 0.36      | 0.46      | 0.67      | 0.82      | 0.94      | 0.75                                  | 0.56      | 0.25      | 0.32      | 0.41      |
| 65-74                                                        | 0.27                                 | 0.53      | 0.38      | 0.34      | 0.67      | 0.59      | 0.84      | 0.99      | 1.19                                  | 1.25      | 1.16      | 0.99      | 0.50      |
| >75                                                          | 0.71                                 | 1.24      | 0.92      | 0.88      | 0.97      | 1.03      | 1.04      | 1.16      | 1.23                                  | 1.45      | 1.91      | 2.36      | 2.65      |
| SMR                                                          | 0.12                                 | 0.18      | 0.19      | 0.21      | 0.28      | 0.3       | 0.35      | 0.36      | 0.34                                  | 0.33      | 0.33      | 0.31      | 0.28      |
